# Supplementary material for: Alternatively Spliced Landscape of PPARγ mRNA in Podocytes Is Distinct from Adipose Tissue
Source: Cells. 2022 Nov 1;11(21):3455. doi: 10.3390/cells11213455 (PMC9653906; doi:10.3390/cells11213455)
Supplement: Supplementary file 1 [file cells-11-03455-s001.zip]

Archive with 4 entries (4 files):
- Supp Table1.xls
- Supp Table2.xls
- Supp Table3.xls
- Supplementary Figures.pdf
