# Supplementary material for: Alternatively Spliced Landscape of PPARγ mRNA in Podocytes Is Distinct from Adipose Tissue
Source: Cells. 2022 Nov 1;11(21):3455. doi: 10.3390/cells11213455 (PMC9653906; doi:10.3390/cells11213455)
Supplement: Supplementary file 1 [file cells-11-03455-s001.zip › Supp Table1.xls]

## Sheet: venn_result_GEO_database
Supplementary Table S1: PPRE-Driven Genes from the PPARgene Dataset, Identified in Podocyte and Adipocyte Datasets
Podocyte Not Adipocyte (453)	Podocyte And Adipocyte (1669)	Adipocyte Not Podocyte (77)
KRTCAP2	AACS	WISP2
PYROXD2	ELMO2	A2M
XDH	BTG2	SLC38A4
SLC4A1	NDUFS6	PBX1
PBX4	TACC2	HP
TMEM139	PDHA1	PROX1
SYCP3	ABCB7	SIX2
GDA	HSPB1	S100B
SLC15A2	PFKP	MGP
MREG	ARRB2	LGALS12
PHYHIP	DECR1	CILP2
UNC5A	CMTM8	PDE3A
LRRN1	PRADC1	AREG
MRPL38	CSPG4	ARHGAP20
TMEM184A	IGF1	GREM2
CCL22	ITPK1	CD302
LRFN5	G3BP1	ISLR
SLCO2B1	HSD17B10	SRPX2
ZMYND15	LMAN1	DIO2
A1CF	UQCR11	IL1RN
CLDN16	GDF15	MAFB
ISL1	CYCS	SLC24A3
C1QTNF3	GPSM2	ALPL
HSPA1L	HIC2	PTGER3
STARD5	GYS1	XPNPEP2
ITGB1BP2	DTNBP1	HSPB6
CORO2A	TAF9B	TC2N
GMPR	TRIB3	CILP
FRRS1	REEP6	TUSC5
SHBG	CLUH	GPX7
SLC16A5	CDK14	AADAC
LLGL2	NDUFS1	MRVI1
FZD9	SOD2	PLA2G2A
KL	AES	CHST1
ATP1B4	ARL2	SLCO3A1
CDS1	KCNK3	CITED1
ADAM19	NDUFAF4	CCL7
ADAM32	STK16	OLFM1
FNDC8	NDUFAB1	CHKB
CYP1A1	FGFR1	SLC19A3
ERO1L	AGPAT1	RORB
XRCC6BP1	CERK	RAMP1
KCNQ5	PDLIM2	ZBTB16
NPHS1	ATP5D	ASPA
SLC39A5	RAB40B	EDNRB
ADRA1A	RCL1	PCK1
NRG4	PIR	CIDEC
FAM154B	LONP1	EBF1
SCN11A	PPCS	HTRA3
CDH24	MRPL1	TRIM69
LCA5L	SYNGAP1	MTERF4
EML5	ARL6IP1	THRSP
FAM195A	BET1L	FMO1
SETD8	FIBCD1	RNF5
NR1I3	PTCD3	ANGPT1
ACAD11	FADS1	GLMP
TJP3	PCYT2	PLIN1
CHRM4	SERPINF1	CD163
NIPAL4	TSC22D1	MYH14
TMEM25	ATXN10	GADD45G
RRAD	ECH1	RBP4
SNAI1	FAHD1	CDO1
SLC35F1	NMNAT1	SEPP1
PFKFB1	RHOT1	PLCL1
CAMK2B	ELOVL5	CACNA1A
NGFR	EPS8	PRR15
GRHL1	DIP2A	PLBD1
CCDC132	SHC1	RASD1
ANO9	ACTR8	SPON2
IL1A	BRCA1	APCDD1
UPK3B	GEN1	KLF15
TMEM79	FAM96B	FABP4
KRT8	S1PR2	HSD11B1
SCN4B	PAPSS2	LAMA4
GATSL2	ACSL3	SDCBP2
MYCL	GRPEL1	PARM1
GLI1	USP6NL	AQP7
TRABD2B	ROCK2
RAB11FIP4	PPP1R15B
SLC25A34	HES1
SLMO2	ALDOC
IL21R	VGLL3
TLR5	SEL1L3
FAM78A	PDCD4
CD200	CEP350
INCA1	FAM73A
SGK2	RHOC
KLRG1	PPP3CA
NEURL3	DDB2
LAMC3	NEIL1
TOX	TSPAN13
CHDH	FITM2
CLDN10	SPIRE2
PTP4A3	MKNK1
ROPN1L	DNAJC15
ERC2	RAD23B
RBP7	MGAT4B
HSD17B7	NCOR2
GAL3ST1	IL17RC
TRIM14	LRRC8D
AIF1L	ALDH18A1
NRSN1	CEP170
SHANK3	UFM1
ABHD16B	MAOA
PFN4	TPI1
SPNS1	APOE
SLC23A3	ALDH2
GPR160	EMP2
SLC14A2	IP6K1
LSMEM2	SRSF6
HUNK	MRAP
GPT	QDPR
GLTPD2	HSPD1
LRRC39	EIF1
GYLTL1B	RIN2
REEP1	TMEM98
UBE2T	CDK1
PRELID2	SLC38A10
PROCA1	OPHN1
TRPV1	NDUFA8
FAM84B	FABP5
FGFBP1	GCC2
FOXG1	GLTSCR2
FMNL1	TOR3A
CDK18	PLIN2
MCF2L	CD82
PDZK1IP1	CHMP1B
CHGB	PPM1K
TMCO6	PMM1
DBP	GCLM
UCKL1	CPEB3
STARD8	BCL2
PPP2R4	NFKB2
CCDC103	PCDH7
CSDC2	ADI1
EMB	SCP2
KRT80	ALCAM
ANKMY1	SH2B2
HHEX	ID1
ACY1	COL18A1
ALOX5AP	ERLIN2
ADHFE1	PPP1R9A
GNAZ	PDZRN3
PSD	TIMM22
CLDN3	GPD1
BTN2A2	PTRF
RASGEF1B	PRPS2
ACSBG1	MMP15
POLR2F	ALAD
AQP3	ASS1
STAB1	GSTM4
ASPDH	RGS4
CLSTN3	UQCRC1
NFE2L3	SNX6
SH3D21	PPP2R5A
CD74	MRPL34
UBXN11	SAMM50
GPR35	SRP72
BCKDHA	ESRRA
PLEKHH1	LDHB
PIK3R2	LRRC8A
SMPD3	DDX49
FOXS1	GNA11
GLDC	TLCD2
KRT18	EBPL
PTPN6	RHBDF1
INHBE	SNX25
CCDC85C	KCNE3
HEY1	CPEB1
ITGAX	ACOT7
PLIN5	ENDOG
ADORA2B	EZR
PHEX	ABHD12
PCDH17	PTGES
TOMM70A	PEX16
KRT19	FGF1
GIPC3	WDR6
NEURL4	FUT4
ADAP2	DNAJA3
NUDT13	ITFG2
DAK	EPHA4
RARRES1	TMEM11
SIM2	IMMT
LRG1	UBE2L6
NRXN3	AGGF1
RHPN2	SPRY2
SEMA4A	TPBG
POU5F1	LZTFL1
VSIG2	GSTP1
CLDN1	GMFB
SLC27A2	LTBR
DDO	AGTPBP1
NHLH1	PRR5
TRIM46	TLE2
LCAT	RPRD1B
ARHGEF25	STAT5A
ST6GAL1	FKBP4
TSSK2	PNPLA6
PSMA6	GIPR
CEACAM1	PERP
UCP3	YIPF2
COL8A2	FHL1
CYP8B1	TNFSF12
LIN28A	PSMD5
DHX58	FAM126B
GCN1L1	LACTB2
AMOT	GANC
TIMD4	RBPMS
ADAM11	ACO2
CDA	TPMT
TEX11	ARID5A
GAREML	LOXL1
GJB4	NFE2L2
FBXO2	KLF4
AMIGO2	ACSF2
TMEM26	PFKL
EVPL	SNN
NR1D1	TMEM140
CACNA1G	GABBR1
AS3MT	POLD2
HYAL1	LSM3
BEAN1	ACOT2
GNB3	PPL
L3MBTL1	PPARGC1A
AGPAT9	ETFA
E2F8	AHRR
PVRL1	RASSF4
CHRNE	MTHFD1
EHF	SOX9
ATXN7L2	CASC4
ACOT1	SYTL4
CPSF4L	CEBPD
RAD51B	VRK2
FBXL6	JUND
NGF	MOSPD1
ALOX5	PHB2
MDGA2	EHBP1L1
FGFBP3	NDRG2
NXPH3	COG4
TGM2	NDUFB8
DEFB1	DIXDC1
YBX2	DNAJC11
ARHGAP30	TIMM17A
ARPP21	CADPS2
CIB2	SEMA3G
DSCAML1	EEPD1
PRICKLE3	AMMECR1
NEURL2	LRRC2
MEOX1	DLST
SYT10	NEDD4L
DOCK8	NCAPD3
PLEKHB1	FST
GRB7	LDLR
BDNF	SCRN1
RASAL1	PROSER2
SEMA3E	COQ5
RASD2	PMVK
TMEM143	SGK1
LRRC17	DDI2
ELF3	RNF7
CXCR2	POLR3G
PODXL2	CPD
CELF6	FBF1
ADCY5	IRF7
ESYT3	PELI3
DEGS2	TBC1D8
MERTK	HSPA2
ISL2	SLC38A9
CCRN4L	ACAP3
TNNC1	NFKBIZ
TRIM55	RAB20
STBD1	PPOX
FOXO6	TAF9
CLDN7	DGAT1
FAM69B	METTL5
CTF1	ACADVL
JMJD7	ISCU
HDGFRP3	RAB15
SV2B	PHGDH
WT1	FDX1
C2CD4C	XIAP
NCCRP1	WNT5A
CLDN23	SH3BGRL2
MYH3	DOPEY2
RSPH1	PEX26
PRUNE	PTGS2
ITGB6	SLC29A3
SLC1A2	SDHD
RGL3	IMPAD1
CERS1	ADAMTSL4
MAGIX	OPN3
ITPKA	SQLE
RHBDL3	DAGLB
CD27	HCFC1R1
RHEBL1	GLIPR2
SPIN4	WBP11
SULT2A1	LYPD3
SOX17	TEX2
GARNL3	MAP1A
SLC6A13	MAP4K3
TINAG	COX7B
RUNDC3B	TMEM185B
IL17RB	ANKRD17
RNFT2	GRPEL2
USP2	SNTA1
ABCG4	H2AFY2
PLCD4	FOXN2
COQ3	NT5E
LACE1	FAM129B
ADRB2	ITGA6
TRERF1	NCK2
TUBB3	SLC16A2
S100A1	TRIM35
SH3TC1	SC5D
GRB14	USP11
NTRK3	IMPA2
MMEL1	PRKDC
CHODL	SULF2
IL12A	NET1
GDPD1	MVD
PUS10	ACLY
KRT81	DNAJC1
POPDC2	ARHGAP12
FAM26F	CCNDBP1
ASGR1	MEX3D
PVRL2	FKBP5
IL6	SCCPDH
SNAI3	GPX4
CHAC1	CCDC85B
EPOR	PRMT1
ANGPT2	FLI1
SSPO	TMOD2
ITGAM	FAM107B
CCNO	IRS2
RGS5	PPDPF
ABCG2	ALG9
ACRV1	PIM3
HPD	ANKRD40
HNF1A	COMTD1
TMEM45B	ACOT9
STXBP2	SPATS2L
OSCAR	ADCK2
DNMT3L	SLC48A1
PLCG2	UQCRQ
BCMO1	RIMS1
ITGA2B	RCN1
CYP1A2	KAT5
CABP4	BCAR3
SRXN1	MAP3K6
EPN3	DHCR7
STARD10	TPD52L1
HOMER2	CRAT
ANAPC2	HN1
KCNS1	POR
INA	VEGFA
SLC16A6	CSRNP1
SUV39H1	PAK1IP1
LY75	TRUB1
PCSK4	ELL
KCNAB2	FAM89A
DMBT1	VAT1
SPNS2	SENP3
FOXA1	ACKR2
VNN1	EEF2K
SLC16A13	TUFM
TEX22	MPDU1
ALDH3A1	MYC
GALNTL6	DECR2
IGDCC4	SPTLC3
KCTD6	MUS81
DDN	PHYH
ARAP2	ACAA2
TMEM35	TMEM53
ABHD3	DAG1
PNMAL1	TIMP1
ANKRD2	RUVBL2
RAD54L	PLOD2
TTYH2	ISCA1
ABCB4	UCK1
GPR146	MRPL9
SORD	RUNDC1
MFSD4	SRSF3
FRK	ICAM2
PPAP2B	LFNG
HOXA4	AUH
TGFA	SLC25A39
MATN1	GNA13
RTP4	MBD2
NPPC	TNFAIP3
COX6B2	PSRC1
THOC6	ALAS1
EFTUD1	FOXO1
ACBD4	MRPL37
AQP1	NDUFV2
ACER2	PDK4
CYP26B1	DUSP10
CNKSR1	FARS2
DNASE1L2	CCDC28A
ATAT1	PKP2
TMEM128	AMPD3
TMOD1	PIAS1
RSAD2	TMEM134
PLLP	STAT1
GLRB	GCLC
AMN	ZC3H14
MSLN	COL8A1
LMTK3	COLEC12
SLITRK1	RPP30
SLC45A3	BLVRB
MEST	GTPBP2
PDZK1	CWC25
RNMTL1	ELK4
RTKN	MKKS
APOA1BP	BANF1
GPRIN3	FAM13A
CRTAC1	SLC22A3
CDCP1	BSG
ERCC6L	GADD45B
EDN2	SLC26A6
SHISA2	BBX
CCDC121	UCP2
CGN	DTX4
TLCD1	BNC1
LTC4S	ALS2
PRSS8	PABPN1
WNT4	NDUFB3
PPFIA4	SLC22A5
PAQR9	SLC25A42
KIF21B	FKBP8
KCNJ5	PTCD2
TSNAXIP1	MMP11
DLX1	MIPEP
DOK7	UCHL3
CSF1R	PPARD
RBP1	ANXA2
MYOM3	SPEG
DCAF12L1	TBC1D24
PSMB10	STK10
PAM16	ABCD3
GATM	HDDC2
RUNDC3A	INPP5F
SPINT2	VPS26B
RNF128	MYBL1
CD274	PAQR7
DAPK1	INPPL1
VAV3	FAM73B
TRPC3	CDC27
HCAR1	MDGA1
MNX1	COPS6
SERHL	BRI3BP
ADRBK2	CNN2
TNNT1	GPC4
LIPT2	LMO7
	SOGA1
	COL4A2
	BPGM
	TCF7L1
	SLC12A7
	HMOX1
	CITED2
	DTX2
	BMF
	FAM126A
	SIAH2
	PFAS
	ABHD5
	MKNK2
	TMBIM1
	EFNA5
	FCGRT
	NXN
	IGF2BP2
	URGCP
	PNPLA3
	MAF1
	ACADM
	GIPC2
	SLC22A23
	DUSP3
	ANGPTL4
	MPZ
	NAMPT
	HECTD1
	SDSL
	SLC31A1
	HACL1
	RAD23A
	FAM102A
	SFXN1
	RNASEH2C
	IRAK2
	GHITM
	NDUFB7
	FOXN3
	TXLNG
	MFGE8
	YAF2
	SP110
	SH3BP2
	PXMP4
	TFB1M
	DCAF4
	ATP9A
	LCLAT1
	TSKU
	ETV3
	PDLIM1
	UQCR10
	CLIC4
	TLE3
	DDX31
	PPP1R14B
	LRP1
	MESDC1
	MMP14
	SERPINI1
	HDHD3
	PLAT
	NUPL2
	TDRD3
	PPP2R5B
	KLHDC3
	GNAI1
	SLC25A4
	CYB5B
	NDRG1
	SESN1
	TMED8
	SDHAF2
	ARHGAP1
	GBE1
	PIP4K2A
	SOD1
	AFAP1
	PACS1
	FSCN1
	TMEM136
	SIRT5
	MSRB2
	ZFP36L1
	CBR3
	NR4A1
	WDR74
	ST6GALNAC4
	MCM7
	ATP5G3
	METTL21B
	IGFBP6
	ABCB9
	TSC22D2
	CFL2
	RASA2
	SLC22A15
	STX18
	DBI
	BTBD1
	LPIN2
	ZHX2
	PDP2
	SMARCA4
	ARMC9
	RPS6KA4
	MRPL14
	C1QTNF6
	TTC8
	AGL
	CEP55
	PALMD
	HS6ST1
	TTC39B
	ENPEP
	TIMM23
	OAS2
	DEGS1
	FAIM
	LIPG
	TBL1XR1
	MGST2
	SLC25A11
	STARD4
	OSBPL1A
	RPL3
	KLB
	ACSL1
	TTI1
	TNFRSF21
	CDC42EP5
	SLC6A8
	CDC45
	TMEM38B
	TAZ
	NFE2L1
	STIP1
	NT5DC2
	CHST7
	CCT3
	SLC25A20
	HSPE1
	IER5
	MAPK13
	EIF4EBP1
	APLN
	C2CD2L
	SNRK
	GUSB
	PMPCB
	NID2
	HYLS1
	CHEK2
	NUDT16L1
	PRKRIP1
	PI4K2B
	MCM4
	TCEA1
	RNF111
	EGLN2
	CHST12
	CLPX
	MRPS36
	RAB34
	PJA1
	CHMP1A
	PHLDA2
	BZW2
	HADHB
	BAHD1
	TST
	LYSMD3
	ERLIN1
	GPX8
	CHCHD10
	TNIP1
	GLRX
	RHOG
	CYB5R3
	CDK2
	GPAM
	CDC37
	FBXL7
	LRRC8B
	SEC14L2
	POLR2A
	MBNL3
	YIF1A
	NR2F6
	TMEM218
	GRINA
	TFPI
	H2AFV
	TMEM87A
	TBC1D22A
	SMTN
	HIP1R
	DGKA
	PQLC1
	ENO1
	SBDS
	DET1
	GALT
	AZIN1
	SLC7A7
	RNPS1
	MB21D2
	ISOC1
	NR2C1
	SLC25A10
	TMEM64
	ARG2
	MKI67
	PEX5
	LENG1
	ZFAND5
	MAFG
	MAP1LC3A
	TOMM5
	SLC41A1
	ZCCHC2
	PAXBP1
	LOX
	FIZ1
	YARS
	ELOVL1
	UBE2E2
	LAMB2
	DTD2
	PBXIP1
	IMMP2L
	MARCKSL1
	RAB11FIP5
	BAG4
	CDKN1A
	CHCHD6
	LPL
	CAT
	CUL7
	CPOX
	SPSB1
	RNF10
	TPM2
	PPP1R11
	TMEM120A
	WDR48
	PIK3R1
	ACACB
	HOXC11
	MAF
	TRAK1
	CSTB
	ADM
	HILPDA
	PREPL
	STAMBPL1
	PTGR2
	CRYL1
	ACP6
	SELM
	PPP1R1A
	ETFB
	HADHA
	IDH1
	XRCC5
	PLA2G16
	RBM39
	HDAC10
	ELMOD3
	ZFYVE27
	RGS17
	RUFY3
	PCTP
	FASTK
	ABCC1
	MRPL51
	TMEM135
	HAX1
	KDM2B
	NEK9
	SLC25A45
	CTSA
	TOMM40
	UBFD1
	MMADHC
	MBOAT7
	HOXC8
	AIG1
	APBA3
	APEX2
	DEDD2
	HAUS7
	HMGCS1
	ZBTB3
	MRPL23
	ITGA7
	ORC4
	CNOT3
	MTIF2
	HIBADH
	TXN2
	TSPAN4
	MPRIP
	ZFAND2A
	CPT1A
	SREBF1
	EFR3A
	SUCLG2
	EPAS1
	AMPD2
	IFNAR2
	LPIN1
	SLIT2
	CCP110
	ITGAE
	GAPDH
	ELK3
	COMMD6
	SLC39A1
	NARS2
	PSME2
	LIMK1
	FAM20C
	TSPAN17
	MMP19
	HOXB7
	TMTC1
	GSTM2
	PCOLCE2
	ATP6V0E2
	PEAR1
	ME1
	PGS1
	KDSR
	MCM8
	SETD4
	SLC4A4
	RHOBTB1
	ACOT8
	BHLHE41
	SMAP2
	FAM101B
	PEBP1
	MRPS18B
	AOX1
	RPL14
	PCSK7
	RMND1
	LTBP3
	ABTB1
	CTTN
	KCNJ8
	PASK
	SLC16A1
	EHHADH
	RANBP9
	USP8
	TMEM147
	LNX1
	INSIG1
	CFD
	SYNGR1
	APOC1
	TMEM37
	ERC1
	WDR73
	YPEL3
	MLYCD
	SCO1
	NDUFA5
	ZBTB40
	SDHA
	NCLN
	TMEM206
	SAT1
	PDLIM5
	BRWD1
	THNSL2
	RCBTB2
	C1QTNF1
	VEGFB
	LETMD1
	UQCRC2
	PVR
	ISCA2
	S1PR3
	ANKZF1
	TMTC2
	UCK2
	LBR
	PGK1
	WLS
	CDC25A
	KLF3
	ANKRD37
	NAT14
	RCN3
	RRN3
	B3GNT5
	TEX264
	COBLL1
	CHPT1
	RPTOR
	ERGIC1
	EIF4EBP2
	MEF2D
	IER2
	WASL
	MACF1
	TRAF3IP2
	MDFIC
	MED20
	ADD3
	RAP1A
	ERI1
	TRIO
	ROGDI
	MRPS35
	RASSF3
	RDH13
	HOXC13
	SLC25A37
	HMGB3
	CTNNBL1
	MID1IP1
	ECHDC1
	NDUFA6
	KLF11
	NDUFAF3
	PHLDA3
	DSP
	GALK1
	NUP214
	IRF1
	DPYSL2
	SOX13
	SSH2
	SDHB
	SOX4
	TSPAN3
	DNAJB1
	AK3
	RHOF
	USP20
	NRP1
	NR2F1
	PLIN4
	JAM3
	FASN
	MRPS14
	PHLPP2
	LAPTM4A
	PRDX6
	GPNMB
	TTF2
	SLC25A26
	DOLK
	ACVRL1
	ACYP2
	PSMA1
	NFATC4
	TMEM60
	NR1H3
	ABCG1
	RGS3
	SQSTM1
	SNRNP70
	SLC35F6
	UAP1L1
	ACAT1
	PLK3
	SMAD3
	RALY
	PHKA2
	ATF3
	UCHL1
	FBXO22
	DGKH
	ELOVL3
	TAGLN2
	SLC16A7
	NDUFA11
	PUSL1
	RASL10B
	MRPL19
	TAPBPL
	PRKAR2A
	KLHL23
	PEX14
	CNOT4
	KLF16
	PGRMC2
	PLTP
	THOC2
	LGALS1
	MINK1
	DNAJA4
	SLC25A1
	EZH2
	EXOC6B
	SRI
	SOCS6
	SLC25A5
	MYO1C
	YWHAE
	WDR1
	AFG3L2
	ADAT2
	CNKSR3
	MGST3
	HBEGF
	CDKN1B
	R3HDM4
	NDUFS8
	ZC3H3
	ABCA1
	DDAH1
	MGAT1
	TNFSF10
	TIPARP
	CRYAB
	CHEK1
	MRPL47
	MUC1
	SLC40A1
	RNF34
	ACOX1
	CD36
	SNHG11
	CENPH
	ANAPC13
	HSD17B11
	SEC31B
	IDH2
	HSD17B4
	ZNHIT1
	SLC12A6
	EFHD1
	COPZ2
	CPSF3L
	NUDT7
	NOP2
	NNAT
	ADAMTS9
	GPCPD1
	BCL9
	MRPL28
	STIM1
	PIGV
	CDK2AP2
	LETM1
	APBB1
	CAMK2D
	ALG14
	LIPE
	SLC25A44
	SFSWAP
	FGD4
	CLP1
	PTGES3
	KIF16B
	CASP8
	CS
	BNIP2
	NRP2
	CPSF7
	MED10
	PTRH1
	CDH2
	COX17
	GTF3A
	ERMP1
	MRPL54
	SIPA1L2
	CCNG2
	RCAN2
	EMG1
	WDR5B
	NCEH1
	PPARG
	HIRA
	SLC47A1
	ORMDL3
	CORO2B
	PAN2
	DMPK
	TECR
	RNF144A
	CBR4
	SLC1A5
	LPXN
	PUS1
	SMYD5
	PEX1
	TUSC2
	MYL6
	FADS2
	HSPA4L
	ENAH
	SMAGP
	PARP14
	PTGFR
	TRIM37
	ABHD15
	CRY1
	ABCC4
	PDRG1
	FAR2
	ZCCHC24
	PIM1
	THBD
	DNAJC7
	PARP11
	NOL3
	IFITM2
	ACTR6
	MRPS18A
	LYRM5
	CHCHD7
	SERINC2
	PPP1CC
	TM7SF2
	CDCA7L
	LEPR
	CCDC109B
	MTOR
	LTBP2
	SRP68
	NDUFS2
	SLC2A8
	SLC25A22
	ILK
	STK38L
	MRPS7
	AOC3
	MTHFD2
	FABP3
	SLC27A1
	TRPV2
	RALGAPA2
	CAMKK1
	OAS3
	ANXA6
	LRIG3
	VAPB
	AP2A1
	FZD7
	AFF4
	MRPS33
	STOM
	AIM1
	SMARCA5
	GAS2L3
	UNC79
	PDE8A
	PLA2G4A
	SMOX
	ARPP19
	FKBP10
	SMAD7
	VLDLR
	VEGFC
	DBT
	SDC4
	HIGD1A
	CALR
	WARS
	NUDT6
	ABCC3
	NAA50
	PIP5K1A
	CARS2
	BTBD2
	MMACHC
	BEST1
	REV3L
	TWF2
	CYC1
	PEX13
	DISP1
	SGTB
	CHUK
	ZDHHC12
	DENND4B
	PDK2
	SRGAP2
	SLC38A2
	SYNJ2
	TRIM26
	ST3GAL6
	ATN1
	TRPT1
	NUDT14
	CAP1
	DUSP1
	SLC44A1
	GFM1
	NPR3
	KBTBD11
	PRPS1
	NDUFB5
	LIPA
	SETD6
	CDC42EP2
	OXR1
	GAMT
	MRC2
	MIDN
	FRAT2
	NAA10
	BAD
	LRPPRC
	NDUFAF7
	MRPL35
	ACO1
	RBX1
	GRHPR
	MYO18A
	MEGF9
	GABARAPL1
	SLC4A2
	ARRB1
	PFKFB3
	SCAMP5
	ECSIT
	LRRC15
	RNF168
	CRYBG3
	CISD2
	RRBP1
	UBXN2B
	PRDX5
	VDAC3
	VDAC1
	CASP7
	TOM1
	PRMT6
	TMEM106A
	CDC20
	ACSL5
	NDUFB6
	TYSND1
	NMT2
	G0S2
	CTSD
	SLC4A7
	RRP1B
	SGMS1
	SEMA3B
	THOP1
	SCARB1
	ADSSL1
	MRPS26
	RBPMS2
	ITPR2
	AK2
	BHLHB9
	RFC4
	OMA1
	BCL2L13
	CCDC30
	SEMA4B
	TMEM63B
	NUP50
	KAT2A
	CSNK1A1
	MFSD1
	PUS7L
	PLEKHF2
	PEX6
	UBAP1
	DHRS3
	DYNLRB1
	PBK
	MR1
	EXOSC5
	TNFRSF12A
	ATF4
	IFRD1
	ARNTL
	SIGMAR1
	TSPAN5
	CCL2
	AMIGO1
	ATAD3A
	TXNIP
	TRIP13
	MAZ
	DFNA5
	ACADS
	MED30
	EPHX2
	CORO6
	ANXA5
	KIF3B
	CPT2
	TOR1B
	LSS
	ZMYM1
	BCL7C
	TRPM4
	ARHGEF40
	UBE2D1
	IDH3A
	HSP90AA1
	SEL1L
	YWHAB
	ENTPD5
	ACSS2
	FGFRL1
	SUCLG1
	EIF4B
	RBKS
	PHLDB1
	SEC23A
	MAGEH1
	PRKCE
	PGM2
	RILPL2
	ROCK1
	TUBE1
	PHF5A
	RGS2
	TAGLN
	CREB3L2
	RTN4
	GFM2
	NDUFB10
	IVNS1ABP
	PGP
	NDUFV3
	ACSS1
	OPLAH
	ST3GAL2
	MRPL18
	TUBA4A
	FBXO21
	CLSTN1
	MYLIP
	RPIA
	PRDX3
	LMAN2
	CHCHD3
	MFAP4
	SLC11A2
	H2AFJ
	DHX32
	DENND5A
	TMEM150C
	BDH1
	COQ6
	COTL1
	CLDN15
	SCYL2
	DOCK9
	UROD
	DDX28
	RBCK1
	PPARA
	ZDHHC8
	PLXNA2
	MGLL
	FBXL15
	DDIT4
	NUS1
	DNAJA2
	NCS1
	ATP5L
	ATP1A2
	NUDT9
	BACE1
	HERPUD1
	BCL2L11
	METTL9
	ATP5O
	TIMM9
	UGDH
	MAP2K5
	LGMN
	SLC5A6
	SDPR
	LAMB1
	NUCB2
	RARRES2
	NOD1
	ADAMTS1
	JMJD6
	PRKG1
	DGKI
	FAM136A
	NFIX
	AKAP1
	HIBCH
	SLC7A5
	AIFM2
	TIMM10
	AK4
	NLN
	SORBS1
	ETFDH
	CYGB
	NME7
	UBE2C
	NQO1
	HSPA9
	AXIN2
	GSTK1
	AP1G2
	MAP3K2
	SLC9A6
	TSPO
	HOXC9
	RAB3D
	TBPL1
	ARRDC3
	SDC1
	MUL1
	DDIT3
	GGT7
	HPCAL1
	PSAT1
	OSR1
	GDPD3
	PTGR1
	FOS
	MRPS5
	CNTRL
	CREG1
	AGPAT2
	HSPA5
	TNFSF13B
	OGFOD3
	CMPK1
	CYP27A1
	PAFAH2
	NPEPL1
	H6PD
	GNPNAT1
	SAP30
	SECISBP2L
	HTATIP2
	PEX3
	PAMR1
	PABPC4
	HADH
	FAM109B
	ABCB10
	ING4
	IDI1
	GLUL
	TRAF4
	HK2
	ELOVL6
	EPHX1
	UBE2E1
	DNAJC2
	GADD45GIP1
	SLC27A4
	ASB6
	PPIF
	EHD3
	COL14A1
	TNFAIP8
	EFEMP2
	ABAT
	CAV1
	DGAT2
	STRBP
	HECTD3
	TNFRSF1B
	GTF3C4
	LGALS9
	SCARB2
	IQSEC1
	BAG2
	HMGCL
	TMEM164
	SLC9A1
	THBS2
	ASNS
	PPM1L
	ISG20
	KCNK15
	HSP90B1
	SMOC1
	SPC25
	SLC25A33
	FAH
	RCE1
	UBE4B
	TIMM8B
	STAP2
	TRIM44
	DNTTIP1
	TRAF1
	GRN
	FAM98C
	SLC2A4
	TRIM32
	LDLRAD3
	LRRC59
	ADCY6
	NPR2
	TMEM170B
	AP3S1
	STOML2
	INMT
	LAS1L
	FLAD1
	LNX2
	ERP44
	PKN1
	ITM2A
	RHBDF2
	CEBPA
	ACSF3
	JMJD1C
	TSC22D4
	OLFML2B
	S100A10
	WDR76
	MRPS2
	CDKN1C
	SIRT3
	ST6GALNAC6
	THUMPD2
	ACTB
	TRMT12
	TLR4
	CMBL
	RAB30
	OSBPL11
	PCDH9
	GBF1
	ACVR2B
	ZSWIM7
	SERPINE1
	UBQLN1
	SOCS2
	GBP3
	PPP2R2D
	TIMM44
	ILVBL
	OXNAD1
	SMIM20
	PLEKHH3
	PRELID1
	FAM162A
	INSR
	TGFBR2
	INTS4
	GALE
	NT5C2
	CIZ1
	WWTR1
	CIB1
	OXSR1
	TNFAIP2
	RAD51D
	MTSS1
	ADPRM
	RGP1
	DLD
	CDK5
	MMD
	CUL2
	DENND4C
	BRPF3
	PKM
	MORC4
	ETV5
	LY6E
	SCUBE2
	GSTO1
	NRCAM
	LSM1
	LYRM4
	IDUA
	CSRP2
	HIPK2
	CCND2
	ADIPOR2
	PEX11A
	CDC34
	PKDCC
	ECHDC2
	UPP1
	CISD1
	TMX2
	PPM1F
	PCSK5
	NDUFA9
	GMNN
	SUDS3
	RNF149
	EGLN3
	PEX19
	UNC119
	GPX3
	NOV
	PSMD7
	SSX2IP
	RAD21
	LRP4
	TMTC4
	SNRPB
	TAPT1
	ENC1
	MICALL2
	POP5
	TCEA3
	LPCAT3
	SF3B4
	VOPP1
	GTF2IRD1
	SMARCA2
	ACOT4
	STC2
	COL6A1
	FOXD1
	GPRC5B
	F11R
	ACTA2
	DERL1
	F3
	MAP4K4
	PLEKHM2
	SYNPO
	DLAT
	TRIT1
	LMNA
	HOXC6
	PRICKLE1
	PEG10
	CCDC92
	KLF10
	FOXO3
	PARD3B
	LPAR1
	PPA1
	CEBPB
	HMGA1
	POPDC3
	GEM
	TFPI2
	NANOS1
	PDHB
	SHKBP1
	JUN
	NAGK
	KDM3A
	ATP2A2
	RETSAT
	ADAM15
	FAM110B
	CALHM2
	FBXO32
	PNN
	TGFBI
	CLPP
	PPP1R3G
	TRIM25
	NUP62
	RASA3
	HNRNPL
	PGD
	ITPRIP
	E2F3
	ABHD6
	CUTA
	WAC
	ATPAF2
	PTPN13
	ECD
	FDPS
	SLC52A2
	SUCLA2
	MTMR11
	SUOX
	IDH3B
	NDUFS7
	SELENBP1
	FOSL1
	NPC1
	PRKCA
	ALDH9A1
	STK17B
	B3GAT3
	ATP8B1
	MAT2A
	LRP11
	PGPEP1
	MBOAT2
	SEMA3C
	DPYSL3
	S100A13
	PAK2
	PRKAG1
	IFI44
	SMAD5
	GARS
	FAM49B
	PNPLA2
	BCKDHB
	PNKD
	HDAC6
	UBC
	PSMB9
	CBR1
	ZNHIT6
	PIK3IP1
	RXRB
	ADIPOQ
