# Supplementary material for: Alternatively Spliced Landscape of PPARγ mRNA in Podocytes Is Distinct from Adipose Tissue
Source: Cells. 2022 Nov 1;11(21):3455. doi: 10.3390/cells11213455 (PMC9653906; doi:10.3390/cells11213455)
Supplement: Supplementary file 1 [file cells-11-03455-s001.zip › Supp Table2.xls]

## Sheet: venn_result_GEO_Lemay
Supplementary Table S2: PPRE-Driven Genes from Lemay and Hwang Manuscript, Identified in Podocyte and Adipocyte Datasets
Podocyte Not Adipocyte (139)	Podocyte And Adipocyte (478)	Adipocyte Not Podocyte (22)
ZNF691	ZNHIT2	ZIC1
ZNF485	ZNF668	TIMP4
ZMAT1	ZNF608	STMN2
ZIC2	ZNF462	RPS17
ZBTB9	ZNF436	RNF5
ZBTB12	ZNF416	PRRX1
XK	ZNF219	PDGFRA
WNT3	ZMAT5	LSP1
WNT10A	ZMAT2	LRRC4
WIBG	ZHX3	LMO3
WFIKKN1	ZFHX4	LINS1
UCP3	XRCC5	INHBB
UCKL1	WTAP	GPC3
TRIM3	WDR46	FYB
TRERF1	WDR27	FGR
TESK2	WDR18	EYA1
TENC1	VPS41	CXCR4
SYT7	VPS29	COL1A2
SYT12	VPS16	CD1D
SYN1	VLDLR	CCR1
STAG3	VEGFB	AQP7
STAC3	VAT1	ACE
SPTBN2	USP37
SPOCK3	UMPS
SPIB	UCK2
SPAG8	UBE2E1
SP6	UBE2C
SOX6	TXNIP
SLC7A14	TUB
SLC39A5	TTLL5
SLC25A34	TSPYL2
SLC23A3	TSEN34
SLC14A1	TRPS1
SGK2	TRPM4
SERTAD3	TRIM65
SEPT6	TRAPPC3
SEMA4G	TPP1
SEMA3E	TP53INP1
SCN4B	TP53BP1
RASGRF2	TOP2B
RAB24	TOM1L2
PTP4A3	TOB1
PSMA6	TNRC6A
PSD	TNPO3
POU5F1	TNK2
POLD4	TNIP1
PITX3	TNFRSF1B
PITX2	TMEM53
PHYHIP	TMEM43
PFKFB1	TMEM30A
PEX5L	TLR4
PDZK1	TLK1
PDF	TIMELESS
PCDH17	THAP8
PAX6	TGFBR2
PAX2	TERF2IP
OSCAR	TEAD3
OBSCN	TCTA
NTN1	TBX15
NRK	TBL1XR1
NR1I3	TAX1BP1
NETO1	TARBP2
MYL1	TAPBP
LRRC29	TAOK3
LMX1B	SYNGR2
LLGL2	SYNGAP1
LIPC	SYNE1
LHX2	STOML2
LAG3	STMN1
KIRREL3	STK19
KIF5A	STK11
KCP	STEAP2
KCNN4	STAT5A
KCND1	SSR4
ITGB1BP2	SRR
ISL2	SRP72
IRF2BP1	SRC
IQCD	SP2
INCA1	SOCS2
IL4I1	SNRPD2
HUNK	SMYD5
HSPB8	SMTN
HSD17B7	SMARCD2
HPX	SMARCD1
HOXD3	SMARCA1
HOXD1	SMAD3
HOXC4	SLC6A9
HOXB9	SLC4A2
HOXA3	SLC41A1
HOXA13	SLC36A4
HIST1H2AI	SLC35E1
GUCY1B2	SLC35A4
GPT	SLC31A2
GPR64	SLC2A4RG
GPR124	SLC27A3
GPR115	SLC26A6
GLI1	SLC25A28
GBX2	SLC25A25
GAS2	SLC25A13
FUT1	SLC22A17
FTSJ2	SLC1A4
FGFR4	SLC1A3
FBXO6	SKIV2L
FANCB	SIRT7
EPN3	SIRT6
EEF1G	SIPA1
DSG3	SFXN5
DOK3	SEZ6L2
DND1	SERP1
DNAH3	SENP3
DLG2	SEMA7A
CYP27B1	SEMA3A
CYP26B1	SEC24C
CYP1A1	SDSL
CXXC4	SDHD
CXCL16	SDHC
CPT1B	SCRIB
CNIH2	SCNM1
CLDN3	SCML1
CIDEB	SCAMP3
CHRFAM7A	SAT2
CHMP4C	SAMD1
CELSR3	RTN3
CAPN3	RTN2
CACNG6	RREB1
C9orf37	RRAS
C1QL4	RPS6KA2
C10orf55	RPS26
BSCL2	RPS2
BDNF	RPL9
BCKDHA	RPE
BAI2	RORA
ARHGAP30	RNPEP
AQP3	RNF182
AMIGO3	RNF14
AFF3	RIT1
ADAM8	RILP
ABCB6	RHOBTB1
A1BG	RFFL
	REST
	RCOR3
	RCL1
	RBM8A
	RBM15B
	RBKS
	RASAL2
	RARA
	RAD23B
	RAD21
	RAD17
	RAD1
	RAB5C
	RAB11FIP2
	QARS
	PTX3
	PTRF
	PTPN23
	PTPN14
	PTMS
	PTEN
	PSME2
	PSME1
	PSMC5
	PRR3
	PRKCD
	PRKAG1
	PRKACA
	PRKAA2
	PRDM1
	PRAF2
	PPP2CA
	PPP1R12B
	PPP1R10
	PPOX
	PPARGC1A
	PPARG
	PPARA
	POLR2H
	POLR2A
	POLR1D
	POLK
	POLG2
	POFUT1
	PLEKHF2
	PLEKHA4
	PLCD3
	PLCB3
	PKP4
	PITPNM1
	PIK3C2B
	PICALM
	PHTF1
	PHLDB3
	PHLDB1
	PHF5A
	PGGT1B
	PFN1
	PFDN2
	PDLIM2
	PCOLCE
	PCGF2
	PCDH7
	PCBP4
	PARVA
	PAQR4
	PANK2
	PAM
	PAK1IP1
	PAK1
	OSGEP
	NXF1
	NUP188
	NUMBL
	NUDT8
	NUDT6
	NUDCD1
	NR4A3
	NR4A1
	NR2F6
	NR2F2
	NR2F1
	NR2C2
	NR2C1
	NPHP4
	NPAS1
	NOVA1
	NMNAT1
	NISCH
	NFIA
	NEU1
	NEDD9
	NDUFB11
	NCOA2
	NBEA
	MYO1C
	MYL6
	MYH10
	MYADM
	MVP
	MTMR4
	MST1
	MRPS18C
	MRPL9
	MRPL48
	MRPL24
	MRPL21
	MRPL14
	MOV10
	MMP19
	MMP15
	MLX
	MLF2
	MITF
	MID2
	MEF2D
	MEF2C
	MED8
	MDM2
	MDM1
	MCEE
	MCAM
	MARVELD1
	MAPRE2
	MAPK8IP1
	MAPK11
	MAML1
	MADD
	LZTR1
	LTBP2
	LRP1
	LRFN3
	LPL
	LNX2
	LNPEP
	LMCD1
	LIX1L
	LASP1
	KPNA4
	KLHL18
	KLF4
	KLF12
	KLF11
	KIRREL
	KIAA1715
	KIAA0319L
	KHSRP
	KCTD9
	KCTD12
	KCTD11
	KCNK6
	KCND2
	JUNB
	ITGA3
	IRAK1
	IQCG
	INPP5B
	ING4
	ING1
	IL11RA
	IGFBP6
	IFITM2
	ICMT
	HSPBP1
	HPCAL1
	HOXD8
	HOXB4
	HOXA6
	HOXA10
	HMGA1
	HINT2
	HIC2
	HIC1
	HEBP2
	HDAC3
	HDAC1
	HADHB
	H2AFY2
	H2AFX
	GTF2A1
	GSN
	GRWD1
	GRK4
	GPS2
	GPRC5C
	GNB1L
	GNAS
	GNA13
	GMPPA
	GLCE
	GIT2
	GIT1
	GFRA1
	GDPD3
	GCLM
	GCAT
	GBA2
	GALT
	GALNT7
	GADD45A
	GABPA
	GAB1
	G0S2
	FZD2
	FURIN
	FOXP1
	FOSL1
	FLOT1
	FLNC
	FLI1
	FKBP5
	FHL3
	FBXL17
	FBXL12
	FBN1
	FASTK
	FANCD2
	FAM50A
	FAM35A
	EWSR1
	ETV2
	ETFA
	ERMAP
	EPN2
	ENTPD5
	ELOVL3
	EIF4G1
	EIF2B4
	EGLN2
	EEF1D
	DVL2
	DUSP6
	DST
	DPM2
	DPF3
	DNAJC17
	DNAJC13
	DNAJA2
	DMPK
	DMD
	DLG4
	DLEU1
	DHRS1
	DDIT3
	CUEDC2
	CSNK2A2
	CSAD
	CRELD1
	CREB5
	CREB3
	CRABP2
	CPNE2
	CPEB2
	CORO1B
	COPG2
	COL1A1
	CNOT2
	CNOT1
	CLN5
	CLDN15
	CLCF1
	CIC
	CHPF
	CHML
	CHEK1
	CHCHD4
	CEBPB
	CDKL5
	CDK5
	CDIPT
	CDCA5
	CDC6
	CDC42EP3
	CD9
	CD68
	CD3EAP
	CD36
	CD2BP2
	CCT7
	CCND1
	CCHCR1
	CCDC18
	CBX5
	CAMK2N1
	CACNB2
	C6orf136
	C5orf15
	C21orf58
	C2
	C1orf43
	C11orf31
	BUB3
	BRPF3
	BRF1
	BRE
	BMF
	BLOC1S2
	BCORL1
	BCL9L
	BCL7C
	BAZ1B
	BANK1
	BAHD1
	BACH1
	ATPAF1
	ATP8B2
	ATP6V1F
	ATP6V1A
	ATP6AP1
	ATP1B1
	ATP10A
	ATN1
	ATAD3B
	ASB6
	ARPC5
	ARIH2
	ARID3A
	ARID1A
	ARHGAP5
	ARHGAP22
	ARCN1
	AP1G2
	ANKRD12
	ANAPC11
	ALDOC
	ALDOA
	AKT1S1
	AKAP8L
	AGPS
	AGL
	ADCK4
	ADAM12
	ACSL3
	ACRC
	ACP2
	ACADVL
	ACAA2
	ABL1
	ABCF3
