# Supplementary material for: Alternatively Spliced Landscape of PPARγ mRNA in Podocytes Is Distinct from Adipose Tissue
Source: Cells. 2022 Nov 1;11(21):3455. doi: 10.3390/cells11213455 (PMC9653906; doi:10.3390/cells11213455)
Supplement: Supplementary file 1 [file cells-11-03455-s001.zip › Supp Table3.xls]

## Sheet: venn_result_database_Lemay
Supplementary Table S3: PPRE-Driven Genes in the PPARGene Dataset and Lemay and Hwang Manuscript
PPARGene Dataset	Lemay & Hwang	Both
AACS	DPM2	PAX7
ELMO2	RPS17	HMGCS2
KRTCAP2	ZHX3	HIC2
ABRA	BBOX1	PDLIM2
PYROXD2	PDF	PHYHIP
FAM187A	ZCCHC16	GRM2
BTG2	CXCR4	RCL1
DNAJB8	IRAK1	SYNGAP1
NDUFS6	ADAM12	NMNAT1
XDH	POLK	ACSL3
1700024G13RIK	PAK1	ALDOC
TACC2	MITF	RAD23B
PDHA1	ZBTB12	ITGB1BP2
SLC4A1	FLJ10385	LLGL2
ABCB7	CD2BP2	GCLM
HSPB1	FGR	PCDH7
PFKP	EPN2	PTRF
PBX4	KCNK6	MMP15
ARRB2	XK	SRP72
DECR1	RNF14	CYP1A1
CBR2	BANK1	SLC39A5
PRADC1	SLC13A1	MYH2
CMTM8	B3GAT1	STAT5A
CRTAM	STGC3	KLF4
CSPG4	HOXA13	NR1I3
ACOT12	PCOLCE	PPARGC1A
IGF1	NFIA	ETFA
SLC35G3	C5orf19	PFKFB1
ITPK1	BLOC1S2	SCN4B
G3BP1	TAOK3	PPOX
HSD17B10	ITGA3	ACADVL
LMAN1	POU3F1	GLI1
TMEM139	OR8D4	SDHD
CYP4F16	USP52	SLC25A34
UQCR11	PHLDB3	H2AFY2
GDF15	BAZ1B	INCA1
CYCS	AGBL4	SGK2
WISP2	ZIC2	FKBP5
GPSM2	LOC492311	FLI1
CPXM2	TERF2IP	PTP4A3
TBX10	FLJ23518	HSD17B7
NOS2	COL1A1	PAK1IP1
GYS1	ZFHX1B	VAT1
TRIB3	PRG	SENP3
TAF9B	C1orf61	ACAA2
DTNBP1	CLN5	TMEM53
REEP6	UNQ2446	MRPL9
CLUH	GNAS	SLC23A3
ZG16	PYY	GPR81
PROP1	KCNC1	GNA13
CDK14	SIRT6	HUNK
NDUFS1	CCL19	GPT
SOD2	FLJ21616	SLC26A6
IGBP1B	KIAA0339	UCKL1
AES	SLC27A3	BMF
ARL2	KIAA1715	ZIC5
SYCP3	FGF17	SDSL
KCNK3	EIF3S2	LRP1
NDUFAF4	CABP1	PSD
STK16	PLIN	CLDN3
GDA	NR2E3	NR4A1
AQP9	PRDM16	AQP3
NDUFAB1	RBM21	IGFBP6
SLC15A2	SIPA1	MRPL14
FGFR1	CTSL2	AGL
MREG	CYorf15B	TBL1XR1
AGPAT1	CDIPT	BCKDHA
CERK	SYT12	EGLN2
ATP5D	PCBP4	HADHB
UNC5A	DKFZp761A052	BAHD1
RAB40B	MAPBPIP	TNIP1
SERPINA12	GMPPA	POLR2A
MRPL38	LOC402682	FGF10
PIR	MGC17299	NR2F6
LRRN1	DEFB119	PCDH17
LONP1	FLJ40201	SMTN
PPCS	GUCY2C	GALT
MRPL1	FLJ46020	NR2C1
AMY1	CNOT1	SLC41A1
ARL6IP1	ZNHIT2	LPL
BET1L	ADCK4	ADRB3
PTCD3	FYB	XRCC5
FIBCD1	CDC42EP3	POU5F1
FADS1	PTMS	FASTK
TMEM184A	FLJ23129	PSMA6
TGOLN1	ZMAT5	UCP3
PCYT2	HTR3A	PSME2
SERPINF1	C20orf118	TBX6
TSC22D1	FGF6	MMP19
ATXN10	CNTFR	RHOBTB1
ECH1	ATAD3B	VEGFB
RHOT1	WNT3	UCK2
FAHD1	LGI4	MEF2D
4833439L19RIK	KIBRA	NFE2
ELOVL5	PB1	KLF11
EPS8	CHRM1	NR2F1
A130010J15RIK	CDC6	ARHGAP30
DIP2A	NYD	CREB3L3
OXT	CLDN6	SMAD3
SHC1	CCDC18	ELOVL3
CCL22	PICALM	MYO1C
ACTR8	AGPS	BDNF
HSD11B2	NEU1	SEMA3E
BRCA1	NAG6	CHEK1
GEN1	NR2C2	CD36
LRFN5	C9orf25	KCNH2
FAM96B	MGC11102	PPARG
S1PR2	GPRC5C	ISL2
PAPSS2	TENC1	DMPK
A2M	OSGEP	SMYD5
PIK3R5	ETV2	MYL6
HIGD1B	ATP10A	IFITM2
USP6NL	PRRX1	LTBP2
GRPEL1	PAQR4	EDN3
SLCO2B1	HDAC3	VLDLR
KRT1	C6orf27	NUDT6
ROCK2	FLJ45831	ATN1
PPP1R15B	HAPLN4	SLC4A2
ZCCHC5	TIAF1	G0S2
ZMYND15	CATSPER4	TRERF1
HES1	HIG2	RNF5
A1CF	RNF182	PLEKHF2
CAR6	SCAMP3	TXNIP
CLDN16	CELSR3	BCL7C
ISL1	GRWD1	TRPM4
C1QTNF3	UMPS	ENTPD5
RIC8	RAD1	RBKS
VGLL3	ERMAP	PHLDB1
SEL1L3	LOC441046	PHF5A
PDCD4	WNT6	C1QTNF4
CEP350	TSP50	CBLN1
HSPA1L	TRIP	OSCAR
FAM73A	TLK1	CLDN15
RHOC	LOC112476	PPARA
PPP3CA	KIAA0404	PCDH1
DDB2	WFIKKN1	DNAJA2
NEIL1	SERP1	EPN3
TSPAN13	EPB49	FABP1
FITM2	CREB3	PACSIN1
SPIRE2	CA9	UBE2C
TRF	GPR174	AP1G2
MKNK1	TCTA	GRIK5
STARD5	KIAA0319L	DDIT3
DNAJC15	KIAA0377	HPCAL1
CCL9	SAT2	GDPD3
MGAT4B	KRTAP13	ING4
NCOR2	BHLHB2	UBE2E1
NEPN	ATP6V1A	ASB6
TRP53INP2	INPP5B	TNFRSF1B
IL17RC	DND1	NEUROG2
LRRC8D	LOC541469	STOML2
GSTA2	C1orf66	LNX2
ALDH18A1	ATBF1	CYP26B1
CEP170	VPS16	TLR4
UFM1	CCND1	SOCS2
ACAA1A	CA5A	TGFBR2
TPI1	IL4I1	CDK5
CORO2A	DSCR2	PADI6
MAOA	RRAS	BRPF3
APOE	MGC13053	PDZK1
ANGPT4	SYT7	RAD21
VAT1L	PGGT1B	APOA1
ALDH2	CSNK2A2	KLK11
GMPR	PTPN14	CEBPB
IP6K1	MGC14288	HMGA1
EMP2	PRDM13	FOSL1
FIGF	ZNF536	PRKAG1
SRSF6	ZNF385	AQP7
QDPR	AMIGO3
MRAP	FGFR4
HIST2H2AA1	PPP1R14D
HSPD1	OR2L13
EIF1	SLC31A2
ZFP219	GRIN2A
RIN2	PAX2
TMEM98	MGC26694
CDK1	NR4A3
SLC38A10	BCL11B
FRRS1	LMX1A
APOC4	GLCE
OPHN1	GPR124
NDUFA8	MRPS18C
SHBG	GBX2
FABP5	C15orf17
SLC16A5	FLJ10099
GCC2	PCYT1B
GLTSCR2	BLK
TOR3A	CNOT2
PLIN2	ARL6IP
CHMP1B	ABI3
CD82	IPLA2
PPM1K	ZNF663
PMM1	POLD4
CPEB3	WNT16
NFKB2	LOC55565
BCL2	CDCA5
FZD9	STMN1
ADI1	LIX1L
SCP2	C20orf28
KL	LOC220686
ALCAM	CHES1
SH2B2	HTR3D
TRIM29	CHMP4C
ID1	CD68
OBP2A	SMARCA1
COL18A1	LOC147650
ATP1B4	SSR4
MPP4	NR2F2
CDS1	RPS6KA2
ERLIN2	PRDM1
PPP1R9A	FLJ36874
TIMM22	C20orf112
PDZRN3	P2RY4
GPD1	WIBG
ADAM19	ZNF608
ADAM32	GBA2
CES1F	CCT7
PRPS2	FLJ22457
GCK	VPS29
MYBPC1	RAB24
ADRA2A	FLJ10276
CELA1	PTPN23
ALAD	C4B
ASS1	ATP6V1F
GSTM4	FLJ11016
F7	BUB3
RGS4	VIL1
UQCRC1	LECT1
SNX6	ASB4
PPP2R5A	PAM
SAMM50	C10orf55
MRPL34	CCL23
4931406C07RIK	HOXD8
ESRRA	FLJ25037
FNDC8	KPNA4
LDHB	ZNF278
LRRC8A	SIRT7
GNA11	ALOXE3
DDX49	RPE
TLCD2	C1orf22
EBPL	HTR4
RHBDF1	EIF2B4
SNX25	CRABP2
IGSF11	LOC201725
RASIP1	GATA3
KCNE3	FLJ43860
CPEB1	ENDOGL1
ERO1L	PIK3C2B
ACOT7	PLA2G12B
H2-Q10	PDZK2
ENDOG	KLHL1
EZR	RTN2
SLC38A4	GADD45A
ABHD12	HIC1
HES7	PX19
LRRTM3	GP1BB
PTGES	TNRC6A
PEX16	CYP27B1
FGF1	ZNF691
WDR6	PAX6
FUT4	C10orf9
CD300A	KIAA0882
XRCC6BP1	LOC152485
DNAJA3	MDM2
ITFG2	NETO1
EPHA4	HOXB4
TMEM11	ICMT
RARB	NBEA
IMMT	LINS1
KCNQ5	MAML1
UBE2L6	ZMAT1
UGT2B36	MYL3
AGGF1	FLJ36208
EPGN	EEF1D
NPHS1	CHML
TPBG	MTMR4
SPRY2	NUDT8
LZTFL1	GPR144
TRPV5	C16orf47
GSTP1	HOXC4
GMFB	TBC1D21
LTBR	MGC2744
AGTPBP1	GUCY1B2
PRR5	NISCH
TLE2	MGC5509
PCSK6	ISGF3G
RPRD1B	TMEM43
1110034G24RIK	FLJ22573
2310079G19RIK	COPG2
FKBP4	PH
ADRA1A	FLJ33817
PNPLA6	SLC35E1
GIPR	KCTD11
ZFP385A	NELF
KISS1R	CKMT1A
NRG4	ABL1
FAM154B	PME
PERP	DKFZp434H2215
SCN11A	KLHL18
YIPF2	SP2
FHL1	KIAA1967
CDH24	CHRFAM7A
TNFSF12	TCF1
PBX1	TMP21
CSRP3	TARBP2
PSMD5	SYNE1
LACTB2	LOC440503
FAM126B	C2
LCA5L	E2IG5
RBPMS	MGC13102
GANC	CRELD1
CHRNA2	SNCG
ACO2	MGC21518
TPMT	RNPEP
ELFN1	MGC21830
KCNA4	C14orf68
LOXL1	WDR27
ARID5A	FAM72A
NFE2L2	FBXL17
EML5	SPTBN2
FAM195A	RPL9
IL23R	OTOP3
SH2D2A	CPLX2
SETD8	ARHGAP5
ACAD11	GAS2
OLFR555	CACNB2
ACSF2	FLJ25421
HP	SRC
TJP3	FLJ23375
PFKL	TIMELESS
SNN	GRK4
TMEM140	PPP2CA
GABBR1	BRE
CHRM4	PHF15
TMEM25	MAPRE2
NIPAL4	SOX6
PROX1	MGC13045
POLD2	MAPK11
CAPN6	PHTF1
LSM3	N/A
PPL	DKFZP761H1710
ACOT2	HOXD3
RRAD	AKAP8L
AHRR	NDUFB11
SNAI1	STK19
RASSF4	PANK2
MTHFD1	SLC1A3
SOX9	BF
GJB5	ADAM8
CASC4	PDZK7
CRABP1	HLXB9
6330416G13RIK	LRRN5
SLC35F1	STK11
SYTL4	SPAG8
PRR36	NOD27
CEBPD	PSMC5
ADRB1	EGFL4
VRK2	C6orf49
SNTG2	SLC2A4RG
JUND	DNAH3
MOSPD1	CXorf1
PHB2	eIF2A
EHBP1L1	LIPC
NDRG2	KIRREL3
CAMK2B	GABRG2
CELF5	C9orf100
LIN28B	NCOA2
ZFP568	DNAJC17
COG4	MGC2803
NDUFB8	KIRREL
DNAJC11	GPC3
DIXDC1	PDGFRA
TIMM17A	CACNG1
CADPS2	MGC21644
SEMA3G	FLJ40448
NGFR	DMD
EEPD1	ZNF668
GRHL1	ABCB6
KLHL10	ZMAT2
OLFR231	PRKACA
CCDC132	NOVA1
AMMECR1	SEC13L1
LRRC2	MLL2
DLST	HDAC1
NEDD4L	ANKRD33
ANO9	LMCD1
NCAPD3	MYCL1
IL1A	GFRA1
FST	ZNF161
UPK3B	KCND2
TMEM79	CDKL5
AQP8	SLCO5A1
LDLR	RFFL
SCRN1	RBM15B
PROSER2	FCER1G
PMVK	FLJ36031
COQ5	TOP2B
SGK1	TESK2
DDI2	DHRS1
SIX2	HOXA6
RNF7	TRAPPC3
POLR3G	HAMP
CPD	PLVAP
DCT	GRK7
FBF1	FLJ37794
IRF7	ZNF297
PELI3	TIMP4
TBC1D8	FBXO6
HSPA2	CACNG6
SLC38A9	C3F
KRT8	FLJ10925
ACAP3	PTCHD1
NFKBIZ	CIDEB
RAB20	ARCN1
CAR2	MR
GATSL2	TTLL5
TAF9	STMN2
AGTR1A	NRK
DGAT1	2022-09-06
METTL5	SFXN5
ISCU	RP11
MYCL	CHPF
RAB15	MID2
K230010J24RIK	COL1A2
PHGDH	GPS2
HS3ST6	GRCC10
MIP	FY
FDX1	FAM13A1
F2	KIAA0467
CASP14	VMD2
XIAP	ARID1A
SH3BGRL2	MGC35366
WNT5A	DKFZp564I122
APOA2	KCP
TRABD2B	C1orf43
DOPEY2	CD3EAP
PEX26	MAPK8IP1
PTGS2	FANCD2
SLC29A3	EFS
LGALS4	PITPNM1
RAB11FIP4	MYADM
IMPAD1	LZTR2
SQLE	MEF2C
ADAMTSL4	FAM50A
OPN3	AFF3
OLR1	LOC340529
DAGLB	ZNF416
HCFC1R1	ZNF485
NRAP	SPIB
GLIPR2	GNG8
SLC7A4	C6orf114
WBP11	MGC42718
TRIM63	QARS
TEX2	KIAA0553
LYPD3	HSPB8
MAP1A	FBXL12
MAP4K3	PTEN
2610318N02RIK	MGC11271
COX7B	RLBP1
TMEM185B	GTF2A1
ANKRD17	FLJ10404
SLMO2	LZTR1
GRPEL2	ATP1A3
SNTA1	BTLA
IL21R	CAPN3
CACNG2	FLJ22875
TLR5	LOC120379
FAM78A	FHL3
NT5E	POLG2
FOXN2	ASCL3
CST11	CD1D
CD200	SMARCD1
GALNT9	PAX4
FAM129B	ZNF219
GCGR	TETRAN
ITGA6	BTBD5
NCK2	POU3F4
SLC16A2	SP6
SC5D	THY28
TRIM35	KCND1
USP11	LNPEP
EIF4E1B	TRDN
TMEM72	MGC29814
PRKDC	ANKRD15
IMPA2	TSGA14
SULF2	ATP8B2
KLRG1	DVL2
NEURL3	APOC3
S100B	NPAS1
NET1	TRPV6
LAMC3	UNQ501
TOX	ACRC
MVD	MRPL24
MGP	ATP1B1
CHDH	C5orf15
CLDN10	C9orf37
ACLY	SEMA3A
DNAJC1	TRIM3
ARHGAP12	C14orf121
LGALS12	REST
GABRG3	RTN3
MEX3D	2022-11-01
CCNDBP1	MTP
SCCPDH	FZD2
GPX4	PARVA
CCDC85B	TEAD3
PRMT1	ARID3A
CILP2	ALS2CR2
ITIH3	TLX2
TMOD2	FLJ40137
MAB21L2	ZNF286
PPDPF	SFRS16
FAM107B	MRPL48
IRS2	FLJ12787
ALG9	SYN1
PIM3	CCHCR1
MEGF11	MED8
ANKRD40	LRFN3
COMTD1	PLCB3
ACOT9	IMP
GPX2	RAB11FIP2
ROPN1L	LRRC4
SPATS2L	RCOR3
ADCK2	ACP2
SLC48A1	ACPT
ERC2	LAG3
RBP7	PRAF2
KLK12	FLNC
PDE3A	THAP8
UQCRQ	CUGBP2
RIMS1	CDX2
RCN1	C4A
KAT5	GRIN2C
BCAR3	SLC7A14
GAL3ST1	PRKCD
MAP3K6	CALCA
DHCR7	VPS41
TPD52L1	TRIM65
SPATC1	MGC24133
SCD1	GNB1L
CRAT	BCL9L
HN1	TAPBP
POR	GPR64
VEGFA	RP42
TRUB1	KRTAP15
CSRNP1	C1orf51
TRIM14	HOXA3
ELL	TOM1L2
FAM89A	PHOX2B
CYP4A14	CPNE2
D630003M21RIK	NR2E1
AIF1L	FLJ10159
AREG	ARIH2
NRSN1	SRR
FATP1	CORO1B
CYP2A4	BRF1
1700011L22RIK	ARPC5
SHANK3	SYNGR2
ACKR2	RPS2
EEF2K	SEC14L3
TUFM	EYA1
MPDU1	CUEDC2
MYC	PITX2
ABHD16B	FLJ45187
FZD10	MGC11134
DECR2	ZFHX4
GYG	ADAMTS19
SPTLC3	TSPYL2
MUS81	SLC25A13
PHYH	LRRC29
DAG1	MIG
TIMP1	MARVELD1
RUVBL2	DLG4
CYP2B10	ZIC1
PFN4	SPOCK3
42430	FURIN
PLOD2	GSN
ISCA1	FLJ16331
UCK1	IQWD1
SPNS1	ADRA1B
SP9	KCNK17
RUNDC1	HOXA10
GPR160	RDBP
5031414D18RIK	ACRBP
SLC14A2	SAMD1
D10JHU81E	TA
CD86	KLHDC6
SRSF3	LOC284013
LSMEM2	LOC283932
LFNG	SILV
ICAM2	ATP6AP1
AUH	SCGN
SLC25A39	CPT1B
MBD2	FLJ20200
TNFAIP3	CYBASC3
PSRC1	MYH10
ALAS1	RPS26
FOXO1	SLC36A4
MRPL37	TNK2
NDUFV2	KIF5A
PDK4	PKP4
DUSP10	SEZ6L2
FARS2	MGC16028
PKP2	CENTD3
CCDC28A	SBBI54
AMPD3	C10orf45
PIAS1	C2orf24
LRRC39	IQCG
GLTPD2	SIMP
GYLTL1B	SEMA7A
TMEM134	MADD
STAT1	TUB
GCLC	KLF12
ZC3H14	LOC128439
CAR9	PCDHAC2
COL8A1	KIAA0406
OLFR284	MCAM
COLEC12	MGC51082
RPP30	GABRA2
BLVRB	GALNT7
REEP1	OBSCN
GTPBP2	MYL1
UBE2T	MGC32871
RPH3A	PCGF2
CWC25	PCANAP6
PRELID2	FLJ13391
ELK4	IQCD
MKKS	MDM1
PROCA1	FCAMR
BANF1	CD9
UBE2QL1	PPP1R10
FAM13A	PTX3
SLC22A3	NXF1
BSG	TP53BP1
GADD45B	KIAA1285
TRPV1	DC12
FAM84B	CAMK2N1
BBX	C11orf8
UCP2	NUMBL
DTX4	MST1
BNC1	H2AFX
FOXG1	FBN1
FGFBP1	INHBB
P2RY14	BAT3
ALS2	MCEE
PABPN1	HOXD1
NDUFB3	AIF1
IGSF21	ALDOA
SLC22A5	HIST1H2AI
SLC25A42	FLJ44635
FKBP8	LASP1
FMNL1	KIAA1853
PTCD2	SKIV2L
WFDC6B	TBX15
MMP11	KCTD9
B3GALT2	LIN28
MIPEP	FAM11A
CDK18	MGC29649
UCHL3	HEBP2
PPARD	GABPA
FSHB	HCNGP
ANXA2	FLJ20457
MCF2L	USP37
SPEG	LOC255374
TBC1D24	PSME1
STK10	STAG3
GREM2	MVP
ARHGAP20	EIF4G1
ABCD3	C1QL4
HDDC2	CREB5
VPS26B	LOC90355
INPP5F	C14orf111
MYBL1	AP1GBP1
PAQR7	ACE
INPPL1	SLC35A4
PDZK1IP1	MLX
ACOT6	PCGF4
CHGB	PTE1
TMCO6	FLJ36268
FAM73B	SLC25A25
SP7	LOC92154
CES1E	TAX1BP1
CDC27	RARSL
MDGA1	MGC26816
COPS6	MGC30208
2310030G06RIK	PRKAA2
CNN2	GIT1
BRI3BP	C14orf35
GPC4	HNRPUL1
WNT1	LOC55974
DBP	FAM35A
LMO7	DPF3
SOGA1	MOV10
COL4A2	LOC348094
NGP	LOC200383
BPGM	RARA
CDRT4	FUT1
SLC12A7	NPHP4
TCF7L1	DLG2
HMOX1	PPP1R12B
CITED2	HH114
DTX2	ANAPC11
GRM3	SERTAD3
CD302	WDR46
STARD8	RORA
FAM126A	LSP1
PPP2R4	DEPDC2
SIAH2	SLC22A17
PFAS	CCR1
CCDC103	C21orf127
CSDC2	HNRPDL
ABHD5	DUSP6
MKNK2	NUP188
TMBIM1	RAB3
VSTM2B	CNIH2
EFNA5	CPEB2
FCGRT	OTX2
NXN	SMARCD2
IGF2BP2	ELAVL4
URGCP	DERPC
EMB	SYNC1
PNPLA3	DKFZp434O0527
MAF1	BCORL1
CHRNA6	TPP1
KRT80	RREB1
ACADM	GPR115
GIPC2	VEGF
SLC22A23	SEC24C
DUSP3	IRF2BP1
ANKMY1	CIC
IRX6	TNPO3
ANGPTL4	PPGB
HHEX	FGF9
MPZ	SLC1A4
NAMPT	MGC33951
HECTD1	HINT2
SLC31A1	DOK3
HACL1	DNCLI1
RAD23A	EDA
ACY1	JUNB
SFXN1	LOC56901
RNASEH2C	76P
FAM102A	PMP22CD
TECTB	TP53INP1
IRAK2	FLJ45300
GHITM	CAP350
NDUFB7	ZBTB9
FOXN3	LOC196996
TXLNG	HRMT1L4
NTRK2	NTN1
MFGE8	WNT10A
SP110	NEUGRIN
YAF2	HSPBP1
SH3BP2	A1BG
D130043K22RIK	CSAD
PXMP4	LOC541565
TFB1M	PARCC1
HDHD1A	ABCF3
DCAF4	CCL28
ATP9A	ATPAF1
LCLAT1	C1orf84
TSKU	CEI
PDLIM1	POLR1D
ETV3	SNAG1
UQCR10	USP26
ISLR	STEAP2
CLIC4	HNF4A
TLE3	hSyn
DDX31	RNASE11
TULP1	TSEN34
1700017B05RIK	KHSRP
PPP1R14B	DDC
ALOX5AP	SEMA4G
MESDC1	MGC15429
ADHFE1	DST
GNAZ	RAB5C
DDI1	RIT1
ZFP777	POLR2H
GYS2	SCML1
MMP14	WTAP
SERPINI1	MLF2
PLAT	LOC389816
NUPL2	DSG3
HDHD3	SPBC24
POU4F3	AKT1S1
TDRD3	C1orf117
PPP2R5B	C14orf4
CALHM1	LCN7
KLHDC3	RAD17
GNAI1	RILP
SLC25A4	LGI3
CYB5B	C6orf136
BTN2A2	WFIKKN2
NDRG1	BSCL2
SESN1	ANKRD12
SDHAF2	SDHC
CDHR4	SNIP
TMED8	FLJ13236
ARHGAP1	LMO3
GBE1	BAI2
PIP4K2A	BACH1
RASGEF1B	FLJ25660
SOD1	KIAA1924
LDHAL6B	MGC50811
AFAP1	EWSR1
PACS1	C20orf70
FSCN1	MRPL21
TMEM136	USHBP1
SIRT5	PPP1R16B
MSRB2	ARMET
ZFP36L1	C1orf8
SRPX2	C10orf94
ACSBG1	RASAL2
CBR3	ZNFN1A2
POLR2F	PLCD3
WDR74	TMEM30A
ST6GALNAC4	NEDD9
MCM7	ELF5
ATP5G3	HOXB9
METTL21B	GCAT
LYVE1	FBXL11
APOH	RBM8A
PDX1	NOB1P
ABCB9	FLOT1
TSC22D2	LOC90580
ASPG	SLC25A28
STAB1	ZNF462
ASPDH	MGC33600
CFL2	FLJ25328
RASA2	SLC6A9
SLC22A15	FOXP1
STX18	MGC21688
KCNA3	POFUT1
DBI	PLEKHA4
BTBD1	CXXC4
LPIN2	LOC220594
TMIGD1	WDR18
ZHX2	SCRIB
PDP2	WDSOF1
CD28	PITX3
SMARCA4	HPX
RPS6KA4	LMX1B
ARMC9	PFN1
C1QTNF6	MGC20983
TTC8	JUB
CLSTN3	FLJ45121
NFE2L3	FLJ33387
CEP55	IMPA3
PALMD	STAC3
HS6ST1	C11orf31
TTC39B	KCTD12
ENPEP	CBX5
SH3D21	REM1
CTSE	HS322B1A
TIMM23	C1orf94
OAS2	ZNF436
GABRD	FLJ11795
EPYC	SCAP1
BIN2	DGAT2L3
DEGS1	PEX5L
CD74	PLA2G4B
LIPG	ING1
FAIM	RASGRF2
KRT16	TRPS1
1110032A03RIK	CRYGA
KLF17	SLC14A1
UBXN11	SET8
MGST2	LHX2
SECTM1B	CXCL16
SLC25A11	GAB1
FAM154A	FLJ22635
STARD4	NXPH1
OSBPL1A	KCNN4
PLCZ1	LOC158160
GPR35	FLJ25801
GYK	DLEU1
PLEKHH1	CLCF1
RPL3	GIT2
KLB	TNFAIP8L2
ACSL1	NUDCD1
TTI1	CHCHD4
PIK3R2	MGC26733
TNFRSF21	FTSJ2
CDC42EP5	DPP10
SLC6A8	C21orf58
CDC45	SCNM1
TMEM38B	ARHGAP22
MC2R	NPAS3
SMPD3	FLJ20171
TAZ	PYDC1
NFE2L1	C3orf21
OLFR71	PGEA1
STIP1	FANCB
FOXS1	DKFZP434H132
NT5DC2	TOB1
DIO2	EEF1G
LRP2	FLJ22104
CYTIP	DNAJC13
CHST7	FLJ13154
CCT3	U2AF1L3
SLC25A20	PFDN2
IER5	HIST2H3C
HSPE1	PRR3
MAPK13	ProSAPiP1
EIF4EBP1	IL11RA
APLN	SNRPD2
C2CD2L
SNRK
GUSB
PMPCB
DMRT2
NID2
HYLS1
GLDC
CD1D1
NUDT16L1
CHEK2
ZFP365
DRD4
PRKRIP1
ARL5C
ADH4
KRT18
PI4K2B
NTSR2
MCM4
TCEA1
RNF111
CHST12
CLPX
MRPS36
RAB34
PJA1
CHMP1A
GM8140
APOC2
PHLDA2
BZW2
PTPN6
TST
LYSMD3
ERLIN1
GPX8
CHCHD10
GLRX
INHBE
CCDC85C
RHOG
CYB5R3
HEY1
ITGAX
CDK2
GPAM
CDC37
PLIN5
PRPH
FBXL7
LRRC8B
SEC14L2
IL1RN
MBNL3
TRP53BP1
YIF1A
ADORA2B
MAFB
TMEM218
PHEX
GRINA
TFPI
3110043O21RIK
H2AFV
TMEM87A
TBC1D22A
HIP1R
CYP17A1
TOMM70A
SCG3
DGKA
PQLC1
KRT19
ENO1
SBDS
GABRB3
CXCL10
GIPC3
DET1
AZIN1
SLC7A7
RNPS1
MB21D2
NEURL4
ISOC1
SLC25A10
TMEM64
ARG2
MKI67
ADAP2
FFAR2
PEX5
LENG1
ZFAND5
HAO2
FH1
MAFG
MAP1LC3A
NUDT13
CCL6
TOMM5
DAK
ZCCHC2
PAXBP1
PLA2G4D
LOX
FIZ1
YARS
ELOVL1
UBE2E2
LAMB2
DTD2
PBXIP1
OLFR285
MARCKSL1
IMMP2L
RAB11FIP5
BAG4
CDKN1A
CHCHD6
KLHL34
A430005L14RIK
CAT
PRL2C5
CUL7
DIO1
CPOX
SPSB1
RNF10
RARRES1
TPM2
PPP1R11
SIM2
TMEM120A
FAM170A
SLC2A2
LRG1
WDR48
PIK3R1
NRXN3
ACACB
MAF
HOXC11
TRAK1
ADCY4
CSTB
ADM
HILPDA
PREPL
RHPN2
DOC2B
STAMBPL1
PTGR2
CRYL1
ACP6
PPP1R1A
SELM
ETFB
TMIE
HADHA
IDH1
SEMA4A
GM11397
PLA2G16
RBM39
HDAC10
ZFYVE27
ELMOD3
FXYD1
LMOD2
SHISA7
VSIG2
RGS17
RUFY3
CLDN1
PCTP
ABCC1
MRPL51
TMEM135
SLC27A2
BCL6B
HAX1
ZFP467
GDF1
REN
NEK9
KDM2B
G6PC
ACTA1
OVOL1
DDO
NHLH1
SLC25A45
CTSA
TOMM40
UBFD1
TCF23
TRIM46
NOBOX
MMADHC
PIP5K1B
TEKT5
MBOAT7
LCAT
HOXC8
AIG1
ARHGEF25
ST6GAL1
APBA3
SLC6A20A
FBXW17
APEX2
FAM181A
SLC24A3
CYP4A31
HMGCS1
DEDD2
HAUS7
ZBTB3
MRPL23
ORC4
ITGA7
CNOT3
MTIF2
HIBADH
TSSK2
MPRIP
TSPAN4
TXN2
ZFAND2A
ALB
LY6D
CPT1A
C1QA
LMO1
CEACAM1
SREBF1
GRIA4
TMEM132D
EFR3A
SUCLG2
LOC102639054
EPAS1
SCNN1G
COL8A2
AMPD2
IFNAR2
CYP8B1
OASL1
LPIN1
SLIT2
PDE1B
TNP1
CCP110
ITGAE
ODF3B
GAPDH
SUCNR1
ELK3
WFDC1
COMMD6
FCGR1
SLC39A1
NARS2
LIN28A
DHX58
LIMK1
ZFP191
FAM20C
TSPAN17
GCN1L1
CLEC10A
AMOT
HOXB7
TMTC1
TIMD4
GSTM2
CTXN3
ADAM11
0610010K14RIK
PCOLCE2
ZFP40
ATP6V0E2
PEAR1
KRT79
FABP2
ME1
CDA
PGS1
ZP2
KDSR
MCM8
SETD4
TEX11
SLC4A4
ACOT8
BHLHE41
GAREML
SMAP2
FAM101B
PZP
KEG1
GJB4
PEBP1
MRPS18B
RPL14
PCSK7
FBXO2
AOX1
RMND1
AMIGO2
TMEM26
LRTM2
LTBP3
ZFP687
CTTN
EVPL
ABTB1
KCNJ8
PASK
SLC16A1
EHHADH
RANBP9
USP8
TMEM147
LCN8
PIPOX
LNX1
SOX18
1810026J23RIK
INSIG1
SYNGR1
CFD
NR1D1
APOC1
PRAMEF8
TMEM37
ITGAL
2010111I01RIK
ERC1
WDR73
YPEL3
THEMIS
MLYCD
SCD2
NDUFA5
SCO1
ZBTB40
SDHA
NCLN
ALPL
TMEM206
CACNA1G
PDLIM5
SAT1
ZFP703
BRWD1
THNSL2
RCBTB2
C1QTNF1
AS3MT
CYP4A10
LETMD1
UQCRC2
HYAL1
PVR
OLFR1328
ISCA2
ARTN
EYA2
BEAN1
BCL2L14
S1PR3
MAGEA4
GNB3
ANKZF1
TMTC2
L3MBTL1
LBR
CBFA2T3
PGK1
WLS
AGPAT9
PCP2
KLF3
CDC25A
ANKRD37
NAT14
RCN3
RRN3
B3GNT5
PTGER3
COBLL1
CHPT1
TEX264
ERGIC1
RPTOR
BARHL2
E2F8
ADH1
XPNPEP2
EIF4EBP2
TLX3
PVRL1
HSPB6
IER2
WASL
MACF1
D930015E06RIK
CHRNE
TRAF3IP2
MDFIC
MED20
EHF
ADD3
VMN1R158
AMICA1
RAP1A
ERI1
TRIO
TC2N
6430573F11RIK
ROGDI
MRPS35
C1QC
RASSF3
CILP
ATXN7L2
ACOT1
RDH13
HOXC13
SLC15A5
SLC25A37
HMGB3
NLRC4
CTNNBL1
ECHDC1
MID1IP1
NDUFA6
CPSF4L
GM867
DNASE2A
NDUFAF3
KCNE1
PHLDA3
DSP
RAD51B
GALK1
NUP214
SUPT16
IRF1
FBXL6
DPYSL2
SOX13
SSH2
SDHB
SOX4
PRAM1
NGF
TSPAN3
AK3
DNAJB1
RHOF
USP20
GPR101
NRP1
ALOX5
PLIN4
TUSC5
MDGA2
FBP2
JAM3
FASN
MRPS14
LAPTM4A
PHLPP2
BTNL9
PRDX6
GPNMB
TTF2
FGFBP3
NXPH3
SLC25A26
DOLK
ACVRL1
GPX7
TGM2
PSMA1
FCGR2B
ACYP2
2700049A03RIK
NFATC4
DEFB1
TMEM60
CRYM
YBX2
ARPP21
NR1H3
CIB2
ABCG1
RGS3
SQSTM1
AADAC
CCR9
DSCAML1
SNRNP70
SLC35F6
PRICKLE3
UAP1L1
ACAT1
SERPINB1A
NEURL2
MEOX1
PLK3
RALY
PHKA2
ATF3
UCHL1
FBXO22
MRVI1
DGKH
GJB6
TAGLN2
SLC16A7
NDUFA11
PUSL1
CES2F
RASL10B
MRPL19
TAPBPL
PRKAR2A
KLHL23
SYT10
CNOT4
PEX14
KLF16
PGRMC2
PLA2G2A
PLTP
CHST1
LGALS1
THOC2
XIRP1
DNAJA4
MINK1
SLC25A1
EZH2
RAP1GAP2
DOCK8
EXOC6B
PLEKHB1
GRB7
SRI
SOCS6
SLC25A5
YWHAE
WDR1
AFG3L2
ZFP575
KRTAP7-1
NEUROG3
ADAT2
CNKSR3
MGST3
HBEGF
CDKN1B
R3HDM4
NDUFS8
RASAL1
ZC3H3
DDAH1
ABCA1
MGAT1
TNFSF10
TIPARP
SLC8A3
DNASE1L3
CRYAB
MRPL47
MUC1
RASD2
TMEM143
CAR4
SLC40A1
RNF34
ACOX1
SNHG11
CPLX1
CENPH
LRRC17
ANAPC13
FAM183B
SLCO3A1
HSD17B11
IDH2
HSD17B4
SEC31B
ZNHIT1
SLC12A6
EFHD1
4930402H24RIK
COPZ2
ELF3
CPSF3L
NUDT7
NOP2
NNAT
ANGPTL7
ADAMTS9
GPCPD1
BCL9
MRPL28
STIM1
PIGV
CDK2AP2
CXCR2
LETM1
APBB1
CAMK2D
ALG14
IFITM5
DNAIC1
LIPE
PODXL2
CELF6
SLC25A44
ADCY5
4921511H03RIK
ESYT3
8430408G22RIK
SFSWAP
FGD4
CLP1
ZFP524
PTGES3
KIF16B
CASP8
CS
BNIP2
NRP2
CPSF7
MED10
CDH2
PTRH1
2810004N23RIK
DEGS2
COX17
ERMP1
GTF3A
MRPL54
POU4F1
SIPA1L2
CCNG2
RCAN2
EMG1
NCEH1
WDR5B
HIRA
MERTK
APLNR
CITED1
SLC47A1
ORMDL3
CORO2B
PAN2
TECR
CCRN4L
AKNAD1
RNF144A
OLFR1259
CBR4
SLC1A5
CCL7
LPXN
SPEM1
6820408C15RIK
TNNC1
GFI1B
PUS1
PEX1
OLFM1
TUSC2
2610034B18RIK
FADS2
ENAH
HSPA4L
SMAGP
TRIM55
STBD1
TAC4
FOXO6
CLDN7
PARP14
PTGFR
TRIM37
ABHD15
AFP
CRY1
OLFR90
MSX2
NUP62-IL4I1
ABCC4
CUZD1
FAR2
PDRG1
FAM69B
ZCCHC24
AU018091
CTF1
PIM1
S100G
NR5A1
THBD
DNAJC7
FBXO40
SERPINA3N
CHKB
PARP11
NOL3
CD180
ACTR6
MYBPH
MRPS18A
LYRM5
CHCHD7
PPP1CC
SERINC2
TM7SF2
CDCA7L
JMJD7
HDGFRP3
LEPR
CCDC109B
MTOR
SRP68
RAB9
SV2B
NDUFS2
SLC19A3
ZFP704
WT1
SLC2A8
ILK
SLC25A22
STK38L
SLC22A1
MRPS7
AOC3
MTHFD2
FABP3
NPTX2
TRPV2
SLC27A1
RALGAPA2
CAMKK1
RORB
OAS3
ANXA6
LRIG3
P2RY1
VAPB
42432
AP2A1
C2CD4C
FZD7
AFF4
TIFAB
NCCRP1
MRPS33
STOM
AIM1
RAMP1
SMARCA5
CLDN23
GAS2L3
UNC79
H2-D1
CES1D
MYH3
PDE8A
RSPH1
PLA2G4A
SMOX
ARPP19
FKBP10
PRUNE
SMAD7
VEGFC
ITGB6
DBT
SDC4
SLC1A2
ZBTB16
CALR
HIGD1A
WARS
LTB
IL4RA
RGL3
FAM149B
NAA50
ASPA
ABCC3
CERS1
AKR1B8
MAGIX
PIP5K1A
ITPKA
CARS2
BTBD2
BEST1
MMACHC
REV3L
TWF2
RHBDL3
ZFP628
CYC1
EDNRB
CD27
DOXL2
RHEBL1
PEX13
DISP1
SGTB
3110002H16RIK
RCVRN
CHUK
RAB33A
ZDHHC12
DENND4B
PCX
PDK2
SRGAP2
SLC38A2
SYNJ2
STK32A
TRIM26
ST3GAL6
KRT36
SPIN4
TRPT1
NUDT14
CAP1
DUSP1
SLC44A1
GFM1
PCK1
NPR3
KBTBD11
SULT2A1
PRPS1
NDUFB5
LIPA
CIDEA
CDC42EP2
SETD6
GAMT
OXR1
SOX17
DPYS
MRC2
GARNL3
PNPLA1
SLC6A13
MIDN
FRAT2
AKR1C19
VTN
BAD
NAA10
LRPPRC
NDUFAF7
CIDEC
EBF1
CYP4A12A
MRPL35
CYP2E1
ACO1
RBX1
1700034O15RIK
GRHPR
MEGF9
MYO18A
HTRA3
GABARAPL1
ARRB1
TINAG
PFKFB3
RUNDC3B
SCAMP5
ECSIT
LRRC15
IL17RB
TFF2
RNFT2
GSTT2
RNF168
TRIM69
MTERF4
CYP2F2
CRYBG3
USP2
CISD2
ABCG4
CALY
COQ3
PLCD4
RRBP1
UBXN2B
PRDX5
VDAC1
VDAC3
CASP7
2200002D01RIK
KCNJ10
RDH16
TOM1
LACE1
PRMT6
D630045J12RIK
CDC20
KCNE1L
TMEM106A
ACSL5
NDUFB6
ADRB2
TRP53INP1
TYSND1
NMT2
CTSD
RETNLB
RRP1B
SLC4A7
SGMS1
WDR64
SEMA3B
TUBB3
THOP1
SCARB1
2300005B03RIK
ADSSL1
URAH
S100A1
MRPS26
SLC7A10
RBPMS2
AK2
ITPR2
THRSP
SPRR1A
LRRC10B
SH3TC1
BHLHB9
GRB14
NTRK3
OMA1
RFC4
BCL2L13
FMO1
CCDC30
NUP50
TMEM63B
SEMA4B
KAT2A
CSNK1A1
2310007L24RIK
MMEL1
MFSD1
1700112E06RIK
PUS7L
PEX6
UBAP1
DHRS3
DYNLRB1
PBK
MR1
BC048679
EXOSC5
CHODL
TNFRSF12A
CCDC62
ATF4
IFRD1
IL12A
GDPD1
ARNTL
9130401M01RIK
MTNR1A
SIGMAR1
TSPAN5
PUS10
CCL2
AMIGO1
ATAD3A
ACTN2
KRT81
POPDC2
NIM1K
TRIP13
MAZ
DFNA5
FAM26F
ASGR1
ACADS
PVRL2
IL6
SNAI3
MED30
ANXA5
EPHX2
CORO6
KIF3B
ANGPT1
CPT2
GLMP
CHAC1
LSS
TOR1B
EPOR
ZMYM1
EPB4.1L4B
ARHGEF40
5031439G07RIK
UBE2D1
IDH3A
HSP90AA1
ASB15
ANGPT2
SEL1L
YWHAB
ACSS2
LY6G5C
FGFRL1
PLIN1
SUCLG1
EIF4B
SSPO
SEC23A
MAGEH1
PRKCE
ITGAM
RILPL2
PGM2
ROCK1
TUBE1
RGS2
TAGLN
CREB3L2
RTN4
GFM2
NDUFB10
CCNO
RXRG
IVNS1ABP
CD163
PGP
RGS5
NDUFV3
OPLAH
ACSS1
ST3GAL2
ABCG2
MRPL18
AKR1B3
FBXO21
TUBA4A
ACRV1
HPD
CLSTN1
LANCL3
MYLIP
RPIA
PRDX3
HNF1A
LMAN2
CHCHD3
MFAP4
SLC25A47
CES2G
SLC11A2
H2AFJ
TMEM45B
DHX32
DENND5A
TMEM150C
STXBP2
SEMA5B
BDH1
COQ6
COTL1
MS4A1
[truncated: 566 more rows]
